# Supplementary material
Source: publisher figshare collection journal article supplement (https://tandf.figshare.com/ndownloader/files/27953423)
Supplement: Supplementary file 1 [file 27953423]

## Sheet: Tabelle1
Organic walled dinoflagellate cysts
total counts (full+empty)
Sample	depth	Brigantedinium spp.	Echinidinium aculeatum	Echinidinium granulatum	Echinidinium zonneveldii	Echinidinium spp.	Protoperidinium monospinum	Protoperidinium americanum	Stelladinium stellatum	Selenopemphix quanta	Selenopemphix nephroides	Islandinium brevispinosum	Dubridinium spp.	Xandarodinium xanthum	Quincususpis concreta	Votadinium calvum	Archaeperidinium constrictum	other peridinioid	Pentapharsodinium dalei	Gymnodinium catenatum	Gymnodinium microreticulatum	Impagidinium spp.	Lingulodinium machaerophorum	Operculodinium centrocarpum	Spiniferites spp.	other gamnodiniaceae	total organic-walled dinocysts	amount counted	collecting surface	hours sampled
MSM79 DT1-100	100	117	1	0	66	0	0	1	0	0	1	2	0	0	1	1	1	4	1	0	0	0	0	0	1	0	197	0.3	0.0078	27.39
MSM79 DT1-200	200	96	0	0	71	0	0	0	2	1	1	1	0	0	2	0	0	5	2	0	0	0	0	0	1	1	183	0.2	0.0078	27.39
MSM79 DT2-100	100	89	0	0	23	1	0	1	1	0	0	0	0	0	1	0	1	0	3	0	0	0	0	0	0	0	120	0.4	0.0078	16.8
MSM79 DT2-200	200	81	0	0	40	1	1	2	2	0	0	0	1	0	1	0	0	0	2	0	0	1	0	0	2	0	134	0.3	0.0078	16.8
MSM79 DT2-400	400	66	3	2	43	3	5	2	2	0	1	2	0	1	4	0	2	0	3	0	0	1	0	0	0	1	141	0.2	0.0078	16.8
MSM79 DT3-100	100	107	3	0	10	1	0	2	0	0	0	4	0	0	1	0	0	0	4	0	0	0	0	3	0	0	135	0.4	0.0078	21.93
MSM79 DT3-200	200	75	0	1	51	0	0	1	1	0	1	0	2	1	0	0	0	1	3	0	0	0	1	2	1	1	142	0.4	0.0078	21.93
MSM79 DT3-400	400	90	2	1	48	1	4	6	1	2	2	4	0	2	2	1	1	1	4	0	0	0	1	0	0	0	173	0.2	0.0078	21.93
MSM79 DT4-100	100	83	3	1	13	0	1	0	3	0	0	9	0	0	1	0	0	0	3	0	0	0	0	1	0	0	118	0.4	0.0078	22.9
MSM79 DT4-200	200	43	2	3	49	0	1	0	0	0	0	1	0	1	0	0	0	0	2	0	0	3	1	0	2	0	108	0.3	0.0078	22.9
MSM79 DT4-400	400	76	3	0	45	1	4	2	3	1	0	9	3	1	1	1	0	3	1	0	1	0	0	0	1	0	156	0.2	0.0078	22.9
MSM79 DT5-100	100	54	0	1	2	0	0	0	1	0	1	1	0	0	0	0	0	0	0	0	0	0	3	1	0	0	64	0.7	0.0078	22.95
MSM79 DT5-200	200	71	0	0	17	2	1	1	0	0	1	1	0	0	0	0	2	0	3	0	0	0	1	0	0	1	101	0.6	0.0078	22.95
MSM79 DT5-400	400	76	2	0	14	0	6	1	1	0	2	0	1	0	1	1	2	2	1	0	1	0	0	0	0	2	113	0.5	0.0078	22.95
MSM79 DT6-100	100	36	1	0	4	0	1	1	1	0	1	0	1	0	0	0	0	2	2	0	0	0	4	0	0	0	54	0.8	0.0078	22.85
MSM79 DT6-200	200	76	1	0	10	0	1	0	0	0	0	0	0	0	0	0	0	0	8	0	2	0	2	1	0	0	101	0.8	0.0078	22.85
MSM79 DT6-400	400	90	0	0	8	0	7	0	0	0	4	4	0	0	1	0	0	0	1	1	0	1	0	0	0	0	117	0.7	0.0078	22.85
MSM79 DT7-100	100	21	1	0	2	2	0	1	0	0	0	0	0	0	0	0	0	0	3	0	3	0	0	1	0	0	34	0.8	0.0078	22.4
MSM79 DT7-200	200	55	0	1	0	0	1	1	0	0	0	1	0	0	0	0	0	0	2	0	9	0	0	0	1	2	73	0.8	0.0078	22.4
MSM79 DT7-400	400	92	1	0	0	0	2	1	0	0	0	2	0	0	0	0	0	0	1	0	2	0	0	0	0	0	101	0.8	0.0078	22.4
Cysts with cell content
MSM79 DT1-100	100	41	1	0	21	0	0	0	0	0	0	1	0	0	1	0	0	1	1	0	0	0	0	0	1	0	27	0.3	0.0078	27.39
MSM79 DT1-200	200	37	0	0	22	0	0	0	0	0	0	1	0	0	0	0	0	0	2	0	0	1	0	0	0	0	26	0.2	0.0078	27.39
MSM79 DT2-100	100	30	0	0	14	0	0	0	0	0	0	0	0	0	0	0	1	0	3	0	0	0	0	0	0	0	18	0.4	0.0078	16.8
MSM79 DT2-200	200	42	0	0	21	0	0	1	0	0	0	0	0	0	0	0	0	0	1	0	0	1	0	0	2	0	26	0.3	0.0078	16.8
MSM79 DT2-400	400	10	1	0	21	0	0	1	0	0	0	2	0	0	0	0	0	0	0	0	0	1	0	0	0	0	26	0.2	0.0078	16.8
MSM79 DT3-100	100	85	3	0	7	0	0	0	0	0	0	3	0	0	1	0	0	0	3	0	0	0	0	3	0	0	20	0.4	0.0078	21.93
MSM79 DT3-200	200	28	0	0	28	0	0	1	0	0	1	0	1	0	0	0	0	1	2	0	0	0	1	1	1	1	38	0.4	0.0078	21.93
MSM79 DT3-400	400	11	0	0	20	0	0	0	0	0	0	1	0	0	0	0	1	0	2	0	0	0	1	0	0	0	25	0.2	0.0078	21.93
MSM79 DT4-100	100	41	1	1	6	0	0	0	1	0	0	8	0	0	0	0	0	0	3	0	0	0	0	0	0	0	20	0.4	0.0078	22.9
MSM79 DT4-200	200	14	1	3	33	0	1	0	0	0	0	0	0	0	0	0	0	0	2	0	0	2	0	0	2	0	44	0.3	0.0078	22.9
MSM79 DT4-400	400	11	0	0	21	0	0	0	0	0	0	4	0	0	0	0	0	1	1	0	0	0	0	0	0	0	27	0.2	0.0078	22.9
MSM79 DT5-100	100	17	1	0	1	0	0	0	0	0	0	1	0	0	0	0	0	0	0	0	0	0	1	0	0	0	4	0.7	0.0078	22.95
MSM79 DT5-200	200	19	0	0	4	0	0	1	0	0	0	1	0	0	0	0	1	0	3	0	0	0	0	0	0	0	10	0.6	0.0078	22.95
MSM79 DT5-400	400	10	0	0	1	0	0	0	0	0	0	0	0	0	0	0	0	0	0	0	0	0	0	0	0	1	2	0.5	0.0078	22.95
MSM79 DT6-100	100	9	0	0	1	0	0	1	0	0	0	0	0	0	0	0	0	0	2	0	0	0	2	0	0	0	6	0.8	0.0078	22.85
MSM79 DT6-200	200	11	0	0	0	0	0	0	0	0	0	0	0	0	0	0	0	0	1	0	1	0	0	1	0	0	3	0.8	0.0078	22.85
MSM79 DT6-400	400	2	0	0	1	0	0	0	0	0	0	1	0	0	0	0	0	0	0	1	0	0	0	0	0	0	3	0.7	0.0078	22.85
MSM79 DT7-100	100	5	0	0	0	0	0	0	0	0	0	0	0	0	0	0	0	0	1	0	1	0	0	0	0	0	2	0.8	0.0078	22.4
MSM79 DT7-200	200	3	0	0	0	0	0	0	0	0	0	0	0	0	0	0	0	0	0	0	1	0	0	0	0	0	1	0.8	0.0078	22.4
MSM79 DT7-400	400	0	0	0	0	0	0	0	0	0	0	0	0	0	0	0	0	0	0	0	0	0	0	0	0	0	0	0.8	0.0078	22.4
calcareous dinoflagellates
total counts (full+empty)
Sample	depth	Thoracosphaera heimii	Calciodinellum albatrosiana	Leonella granifera	Scrippsiella trochoidea	Scrippsiella regalis/operosum	Sphaerodinella tuberosa	other calcareous dinocysts	total calcareous dinocysts	amount counted	collecting surface	hours sampled
MSM79 DT1-100	100	0	0	5	4	0	0	0	9	0.3	0.0078	27.39
MSM79 DT1-200	200	0	3	7	7	0	5	0	22	0.2	0.0078	27.39
MSM79 DT2-100	100	1	0	0	3	0	1	0	5	0.4	0.0078	16.8
MSM79 DT2-200	200	1	3	13	2	0	2	0	21	0.3	0.0078	16.8
MSM79 DT2-400	400	1	2	5	5	0	1	0	14	0.2	0.0078	16.8
MSM79 DT3-100	100	0	2	2	25	0	2	0	31	0.4	0.0078	21.93
MSM79 DT3-200	200	2	15	23	15	0	5	1	61	0.4	0.0078	21.93
MSM79 DT3-400	400	1	6	27	3	0	1	1	39	0.2	0.0078	21.93
MSM79 DT4-100	100	2	1	4	49	0	11	0	67	0.4	0.0078	22.9
MSM79 DT4-200	200	1	8	20	12	0	1	0	42	0.3	0.0078	22.9
MSM79 DT4-400	400	1	6	19	9	0	6	0	41	0.2	0.0078	22.9
MSM79 DT5-100	100	1	1	4	14	0	2	0	22	0.7	0.0078	22.95
MSM79 DT5-200	200	3	10	40	27	2	2	0	84	0.6	0.0078	22.95
MSM79 DT5-400	400	1	12	20	11	0	3	0	47	0.5	0.0078	22.95
MSM79 DT6-100	100	4	3	0	7	0	4	0	18	0.8	0.0078	22.85
MSM79 DT6-200	200	2	3	9	6	1	4	0	25	0.8	0.0078	22.85
MSM79 DT6-400	400	2	12	17	4	0	16	0	51	0.7	0.0078	22.85
MSM79 DT7-100	100	8	1	2	6	0	4	0	21	0.8	0.0078	22.4
MSM79 DT7-200	200	9	5	10	3	3	18	0	48	0.8	0.0078	22.4
MSM79 DT7-400	400	6	25	17	2	0	20	0	70	0.8	0.0078	22.4
Cysts with cell content
MSM79 DT1-100	100	0	0	1	4	0	0	0	5	0.3	0.0078	27.39
MSM79 DT1-200	200	0	0	0	4	0	1	0	5	0.2	0.0078	27.39
MSM79 DT2-100	100	0	0	0	2	0	0	0	2	0.4	0.0078	16.8
MSM79 DT2-200	200	0	0	0	0	0	0	0	0	0.3	0.0078	16.8
MSM79 DT2-400	400	0	0	0	2	0	0	0	2	0.2	0.0078	16.8
MSM79 DT3-100	100	0	1	0	11	0	0	0	12	0.4	0.0078	21.93
MSM79 DT3-200	200	0	0	0	5	0	0	0	5	0.4	0.0078	21.93
MSM79 DT3-400	400	0	0	0	0	0	0	0	0	0.2	0.0078	21.93
MSM79 DT4-100	100	0	0	0	23	0	0	0	23	0.4	0.0078	22.9
MSM79 DT4-200	200	0	1	1	5	0	0	0	7	0.3	0.0078	22.9
MSM79 DT4-400	400	0	0	0	3	0	0	0	3	0.2	0.0078	22.9
MSM79 DT5-100	100	0	0	0	5	0	0	0	5	0.7	0.0078	22.95
MSM79 DT5-200	200	1	0	1	11	1	0	0	14	0.6	0.0078	22.95
MSM79 DT5-400	400	0	0	0	4	0	0	0	4	0.5	0.0078	22.95
MSM79 DT6-100	100	0	0	0	0	0	0	0	0	0.8	0.0078	22.85
MSM79 DT6-200	200	0	0	0	2	0	0	0	2	0.8	0.0078	22.85
MSM79 DT6-400	400	0	0	0	1	0	0	0	1	0.7	0.0078	22.85
MSM79 DT7-100	100	0	0	0	2	0	0	0	2	0.8	0.0078	22.4
MSM79 DT7-200	200	0	0	0	0	0	0	0	0	0.8	0.0078	22.4
MSM79 DT7-400	400	0	0	0	0	0	0	0	0	0.8	0.0078	22.4
Planktonic foraminifera
total counts (full+empty)
Sample	depth	Globorotalia inflata	Neogloboquadrina incompta	Globigerina bulloides	Globigerinella calida	Orbulina universa	Neogloboquadrina deutertrei	Globigerinita glutinata	Globorotalia menardii	Globugerinoides ruber white + pink	Glodorotalia scitula	Glodigerinoides sacculifer	Turborotalita quinqueloba	Turborotalia humilis	Globorotalia theyeri	Glodigerinella digitata	Globoturborotalia rubeszenz	other foraminifera	total	collecting surface	hours sampled
MSM79 DT1-100	100	24	72	12	9	0	2	1	1	1	1	0	0	0	0	0	0	0	99	0.0078	27.39
MSM79 DT1-200	200	16	28	12	3	0	0	0	0	2	4	1	0	0	0	0	0	0	50	0.0078	27.39
MSM79 DT2-100	100	17	46	8	9	0	0	0	0	0	0	0	0	0	0	0	0	0	63	0.0078	16.8
MSM79 DT2-200	200	2	9	5	3	0	0	2	0	0	3	0	0	0	0	0	0	0	22	0.0078	16.8
MSM79 DT2-400	400	3	32	16	8	0	0	2	0	0	1	0	1	0	0	0	0	0	60	0.0078	16.8
MSM79 DT3-100	100	15	50	20	4	0	1	0	0	3	0	0	0	6	0	0	0	0	84	0.0078	21.93
MSM79 DT3-200	200	3	20	36	2	0	0	2	0	0	1	0	0	8	0	0	0	0	69	0.0078	21.93
MSM79 DT3-400	400	2	31	39	4	0	0	3	0	0	4	0	0	4	0	0	0	0	85	0.0078	21.93
MSM79 DT4-100	100	12	22	10	5	0	0	0	0	0	0	0	0	0	0	0	0	0	37	0.0078	22.9
MSM79 DT4-200	200	2	8	33	0	3	0	1	0	1	0	0	1	0	0	0	0	0	47	0.0078	22.9
MSM79 DT4-400	400	1	7	10	1	1	0	0	0	0	1	0	0	0	1	0	0	0	21	0.0078	22.9
MSM79 DT5-100	100	6	21	13	2	1	0	0	0	1	8	0	0	0	0	0	0	0	46	0.0078	22.95
MSM79 DT5-200	200	2	15	35	1	8	0	1	0	0	4	0	1	1	0	0	0	0	66	0.0078	22.95
MSM79 DT5-400	400	1	13	32	1	5	0	1	0	1	4	0	0	1	0	1	0	0	59	0.0078	22.95
MSM79 DT6-100	100	23	14	14	2	3	0	1	0	4	3	0	0	0	0	0	2	0	43	0.0078	22.85
MSM79 DT6-200	200	1	8	17	2	1	0	0	1	0	9	0	0	1	0	0	0	1	40	0.0078	22.85
MSM79 DT6-400	400	6	7	40	1	0	0	1	0	0	1	0	0	1	0	0	0	1	52	0.0078	22.85
MSM79 DT7-100	100	17	22	15	2	3	0	0	0	2	0	0	0	0	0	0	0	0	44	0.0078	22.4
MSM79 DT7-200	200	3	2	9	2	5	0	0	0	0	1	0	0	0	0	0	0	0	19	0.0078	22.4
MSM79 DT7-400	400	6	17	42	0	0	0	0	1	1	0	0	0	0	0	1	0	0	62	0.0078	22.4
Shells with cell content
MSM79 DT1-100	100	8	60	0	9	0	0	0	0	0	0	0	0	0	0	0	0	0	69	0.0078	27.39
MSM79 DT1-200	200	9	14	2	1	0	0	0	0	0	4	0	0	0	0	0	0	0	21	0.0078	27.39
MSM79 DT2-100	100	14	33	0	4	0	0	0	0	0	0	0	0	0	0	0	0	0	37	0.0078	16.8
MSM79 DT2-200	200	1	0	0	2	0	0	0	0	0	2	0	0	0	0	0	0	0	4	0.0078	16.8
MSM79 DT2-400	400	1	0	0	1	0	0	0	0	0	0	0	0	0	0	0	0	0	1	0.0078	16.8
MSM79 DT3-100	100	9	30	1	2	0	0	0	0	0	0	0	0	0	0	0	0	0	33	0.0078	21.93
MSM79 DT3-200	200	2	1	1	0	0	0	0	0	0	0	0	0	0	0	0	0	0	2	0.0078	21.93
MSM79 DT3-400	400	0	0	0	0	0	0	0	0	0	0	0	0	0	0	0	0	0	0	0.0078	21.93
MSM79 DT4-100	100	11	16	0	5	0	0	0	0	0	0	0	0	0	0	0	0	0	21	0.0078	22.9
MSM79 DT4-200	200	1	1	2	0	2	0	0	0	0	0	0	0	0	0	0	0	0	5	0.0078	22.9
MSM79 DT4-400	400	0	1	0	0	0	0	0	0	0	0	0	0	0	0	0	0	0	1	0.0078	22.9
MSM79 DT5-100	100	2	7	6	1	0	0	0	0	0	8	0	0	0	0	0	0	0	22	0.0078	22.95
MSM79 DT5-200	200	1	2	0	1	0	0	0	0	0	2	0	0	0	0	0	0	0	5	0.0078	22.95
MSM79 DT5-400	400	0	1	0	0	0	0	0	0	0	0	0	0	0	0	0	0	0	1	0.0078	22.95
MSM79 DT6-100	100	15	6	1	2	0	0	0	0	0	3	0	0	0	0	0	1	0	13	0.0078	22.85
MSM79 DT6-200	200	1	2	3	2	0	0	0	0	0	9	0	0	0	0	0	0	0	16	0.0078	22.85
MSM79 DT6-400	400	4	0	0	0	0	0	0	0	0	0	0	0	0	0	0	0	0	0	0.0078	22.85
MSM79 DT7-100	100	8	6	4	2	1	0	0	0	0	0	0	0	0	0	0	0	0	13	0.0078	22.4
MSM79 DT7-200	200	1	0	0	0	2	0	0	0	0	0	0	0	0	0	0	0	0	2	0.0078	22.4
MSM79 DT7-400	400	2	3	0	0	0	0	0	0	0	0	0	0	0	0	0	0	0	3	0.0078	22.4
